# Supplementary material for: In Vitro Synergistic Activity of Antimicrobial Agents in Combination against Clinical Isolates of Colistin-Resistant Acinetobacter baumannii
Source: PubMed Central journal article supplement (PMC5075085; doi:10.1128/aac.00839-16), 2016-10-21
Supplement: AAC.00839-16_zac011165694so1.pdf [file AAC.00839-16_zac011165694so1.pdf]

**Table S1. Microbiological and genotypic characteristics of colistin-resistant *Acinetobacter baumannii* strains**

| Strain   | Source | ST  | Type of carbapenemase |        |        |       |
|----------|--------|-----|-----------------------|--------|--------|-------|
|          |        |     | OXA-23 <sup>a</sup>   | OXA-51 | OXA-69 | IMP-1 |
| <b>a</b> | Blood  | 191 | +                     | +      | +      | +     |
| <b>b</b> | Blood  | 191 | +                     | +      | +      | +     |
| <b>c</b> | Blood  | 191 | +                     | +      | +      | +     |
| <b>d</b> | Blood  | 191 | +                     | +      | +      | +     |
| <b>e</b> | Blood  | 191 | +                     | +      | +      | +     |
| <b>f</b> | Blood  | 191 | -                     | +      | -      | -     |
| <b>g</b> | Blood  | 357 | +                     | +      | +      | +     |
| <b>h</b> | Blood  | 357 | -                     | +      | -      | +     |
| <b>i</b> | Sputum | 191 | +                     | +      | +      | +     |

<sup>a</sup> IS*Aba1* enhanced *bla*<sub>OXA-23</sub>-like
